# Supplementary material for: Genetic Interaction Between Site-Specific Epigenetic Marks and Roles of H4v in Transcription Termination in Trypanosoma brucei
Source: Front Cell Dev Biol. 2021 Oct 14;9:744878. doi: 10.3389/fcell.2021.744878 (PMC8551723; doi:10.3389/fcell.2021.744878)
Supplement: Supplementary file 8 [file Table_7.XLSX]

## Sheet: A. ribo- RNAseq CDS
Supplementary Table 7. Statistics for transcriptome analysis and VSGs
A. summary of statistics comparing median values of WT vs. KO mutants in gene expression: reads mapping to sense or antisense orientation, or both orientations (all reads) were analyzed separately (rRNA-depleted stranded RNA-seq mapped to Lister 427 CDS)
Kruskal-Wallis One-Way Analysis of Variance Test
Reads analyzed	Kurskal Wallis chi-squared	P-value
all reads	136.9	< 2.2E-16
sense only	120.19	< 2.2E-16
antisense only	4198.5	< 2.2E-16
Mann-Whitney U Test (wilcox.test)
Reads analyzed	Compared with WT	W statistic	P-value
all reads	J∆	36927000	7.879e-06
	H3v∆	36426000	0.003942
	H3v∆ J∆	35705000	0.5484
	H4v∆	36660000	0.0002899
	H4v∆ J∆	36597000	0.0006173
	DKO no Tet	37625000	2.404e-11
	DKO with Tet	38091000	3.542e-16
	TKO no Tet	36222000	0.02537
	TKO with Tet	37748000	1.59e-12
sense only	J∆	37023000	1.812e-06
	H3v∆	36630000	0.0004211
	H3v∆ J∆	35044000	0.1356
	H4v∆	35785000	0.393
	H4v∆ J∆	35717000	0.5243
	DKO no Tet	36924000	8.193e-06
	DKO with Tet	37277000	2.469e-08
	TKO no Tet	35419000	0.7606
	TKO with Tet	36877000	1.635e-05
antisense only	J∆	35245000	0.3918
	H3v∆	33409000	2.58e-11
	H3v∆ J∆	42315000	< 2.2E-16
	H4v∆	44716000	< 2.2E-16
	H4v∆ J∆	44728000	< 2.2E-16
	DKO no Tet	44244000	< 2.2E-16
	DKO with Tet	45579000	< 2.2E-16
	TKO no Tet	43869000	< 2.2E-16
	TKO with Tet	45708000	< 2.2E-16

## Sheet: B. polyA RNAseq CDS
Supplementary Table 7. Statistics for transcriptome analysis and VSGs
B. summary of statistics comparing median values of WT vs. KO mutants in gene expression: reads mapping to sense or antisense orientation, or both orientations (all reads) were analyzed separately (PolyA-selected stranded RNA-seq mapped to Lister 427 CDS)
Kruskal-Wallis One-Way Analysis of Variance Test
Reads analyzed	Kurskal Wallis chi-squared	P-value
all reads	486.14	< 2.2E-16
sense only	471.33	< 2.2E-16
antisense only	3077.6	< 2.2E-16
Mann-Whitney U Test (wilcox.test)
Reads analyzed	Compared with WT	W statistic	P-value
all reads	J∆	33086000	1.444e-14
	H4v∆	32656000	< 2.2E-16
	H4v∆ J∆	33007000	2.008e-15
	TKO no Tet	35314000	0.5233
	TKO with Tet	38540000	< 2.2E-16
sense only	J∆	33080000	1.26e-14
	H4v∆	32661000	< 2.2E-16
	H4v∆ J∆	33000000	1.677e-15
	TKO no Tet	35301000	0.4967
	TKO with Tet	38439000	< 2.2E-16
antisense only	J∆	35408000	0.7331
	H4v∆	31506000	< 2.2E-16
	H4v∆ J∆	33018000	2.673e-15
	TKO no Tet	36939000	6.566e-06
	TKO with Tet	47651000	< 2.2E-16

## Sheet: C. MC and CI VSGs
Supplementary Table 7. Statistics for transcriptome analysis and VSGs
C. summary of statistics comparing median values of WT vs. KO mutants in levels of minichronosomal VSGs or Chr. Internal VSG (rRNA-depleted stranded RNA-seq mapped to VSGnome
Kruskal-Wallis One-Way Analysis of Variance Test
Reads analyzed	Kurskal Wallis chi-squared	P-value
Minichromosomal VSGs	319.28	< 2.2E-16
Chr. Internal VSGs	13350	< 2.2E-16
Mann-Whitney U Test (wilcox.test)
Reads analyzed	Compared with WT	W statistic	P-value
Minichromosomal VSGs	J∆	1932	8.896e-16
	H3v∆	1820	1.193e-12
	H3v∆ J∆	1886	1.903e-14
	H4v∆	1865	7.321e-14
	H4v∆ J∆	1884	2.164e-14
	DKO no Tet	1936	6.788e-16
	DKO with Tet	1936	6.788e-16
	TKO no Tet	1876	3.631e-14
	TKO with Tet	1936	6.788e-16
Chr. Internal VSGs	J∆	5672300	< 2.2E-16
	H3v∆	4411400	< 2.2E-16
	H3v∆ J∆	4427400	< 2.2E-16
	H4v∆	5020300	< 2.2E-16
	H4v∆ J∆	5179000	< 2.2E-16
	DKO no Tet	5911600	< 2.2E-16
	DKO with Tet	6056100	< 2.2E-16
	TKO no Tet	4948900	< 2.2E-16
	TKO with Tet	6042700	< 2.2E-16
